# Supplementary material
Source: publisher site journal article supplement (https://www.dovepress.com/article/433511)
Supplement: Supplementary file 1 [file get_supplementary_file.php]

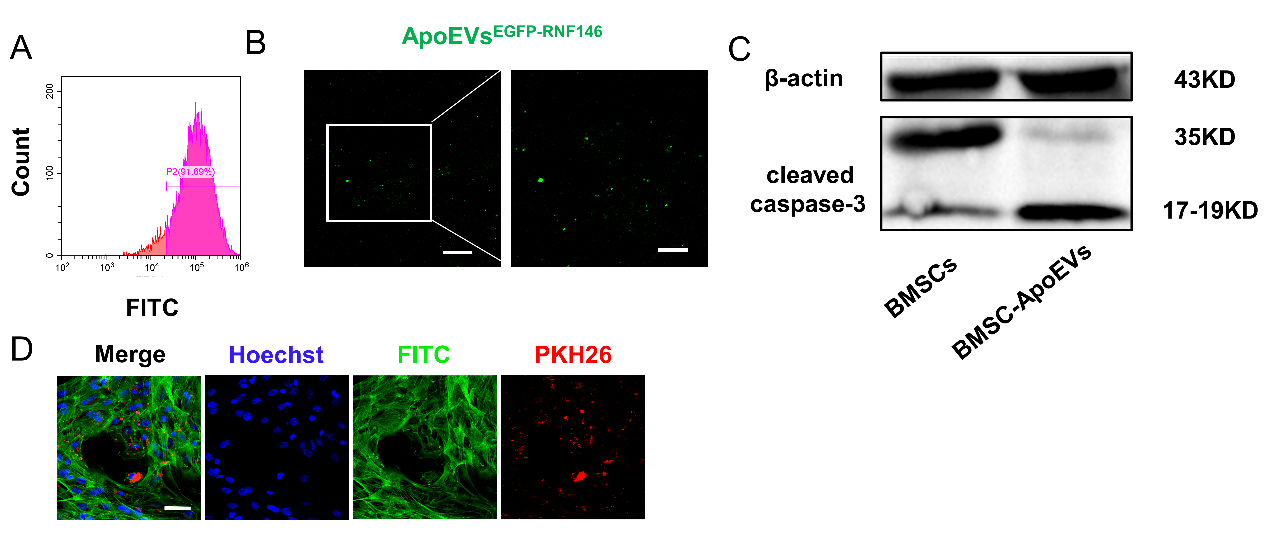


**Fig. S1 Characterization and Internalization of** **ApoEVs**

(A) Flow cytometry showed the Annexin V (+) ApoEVs was ~91.7%. (B) Representative confocal laser scanning microscopy image of ApoEVs stained with Annexin-V showed phosphatidylserine exposed on the surface. Scale bar, 20 μm (left) and 10 μm (right). (C) Western blots of the apoptotic marker protein cleaved caspase-3 in the BMSCs and BMSC-derived ApoEVs. (D) Representative images of ApoEVs taken up by BMSCs observed by CLSM. Red, PKH26 labeled ApoEVs; green, phalloidin labeled cytoskeleton; blue, Hoechst labeled nucleus. Scale bar, 50 μm.


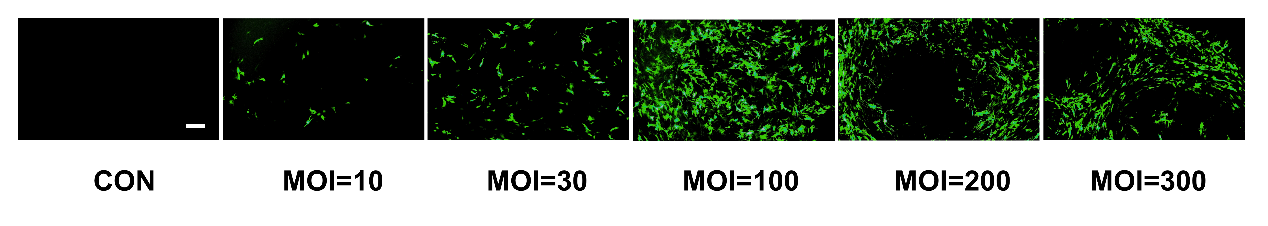


**Fig. S2 Screening of adenovirus optimal multiplicity of infection**

Fluorescence microscope images of BMSCs transduced by HBAD-EGFP adenovirus with different MOI. Green, the reporter gene EGFP carried by the adenovirus. Scale bar, 500 μm
